# Supplementary material
Source: ML conference proceedings conference paper supplement (https://proceedings.neurips.cc/paper_files/paper/2023/hash/623e5a86fcedca573d33390dd1173e6b-Abstract.html)
Supplement: Supplementary file 1 [file 623e5a86fcedca573d33390dd1173e6b-Supplemental-Conference.zip]

Archive with 2 entries (2 files):
- NIPS_2023_Scene_Diffusion_Appendix.pdf
- nips_video_submission_authors.mp4
